# Supplementary material for: Comparative genomic analysis of the arthropod muscle myosin heavy chain genes allows ancestral gene reconstruction and reveals a new type of 'partially' processed pseudogene
Source: PubMed Central journal article supplement (PMC2257972; doi:10.1186/1471-2199-9-21), 2008-02-06

## Additional File 2

Figures 1-9 show the protein sequence alignments of the alternative exons. The upper sequences, termed Mhc1, Mhc3, and Mhc4, respectively, represent either the variant “a” exons (e.g. Figure 1 or Figure 3) or the corresponding parts of constitutive exons (e.g. Figure 2).

Figure 2 and Figure 6A: Most genes do not have introns at the positions corresponding to the alternatively spliced *Dap*, *Tic*, *Pdc*, and *Bm* exons. Because these exons span the variable loop-1 (Figure 2) and loop2 (Figure 6A) regions their start and end positions are not conserved. In Figure 6A, the variant “b” sequences of *Bm*, *Dap*, *Pdc*, and *Tic* have been directly aligned with their corresponding variant “a” sequences.

Figure 9: Alignment of the potential carboxy-termini of the *Mhc* genes. For better understanding a gap (-) has been introduced between the last constitutive exon and the following alternative exons. In the case of *AeaMhc3*, *CpqMhc3*, *CpqMhc4*, and *AngExon15* the carboxy-termini are elongations of the last constitutive exon and not separated exons.

The alignments of the sections of the *Mhc1* genes of Figure 1 (main manuscript) showing the relationship between the exon-intron structures of the regions containing the alternatively spliced exons have been taken from Figure 2 (main manuscript) for better comparison. Continuous lines connect variants that are almost identical and thus expected to be derived from a common ancestor. Bold lines connecting alternative exons in regions containing multiple variants per *Mhc1* gene highlight particularly conserved exons in these sets. Dotted lines represent putative connections between certain variants although their identity is not very strong on the protein level.

For the construction of the figures showing the comparison of the sequence identity between each exon and all variant exons of every other Mhc1 proteins see Materials and Methods in the main manuscript. For interpretation, the figures have to be read in columns. The highest identity between an exon listed on top and any variant of a certain Mhc1 protein listed on the left side has been set to 1 (red color) while the differences of the values of the lower identity exons to the value of the highest identity have been plotted for the other combinations of exons. Thus, in every column the highest identity of the named exon to one of the variants of the other Mhc1 proteins is visualized.

Figure 1

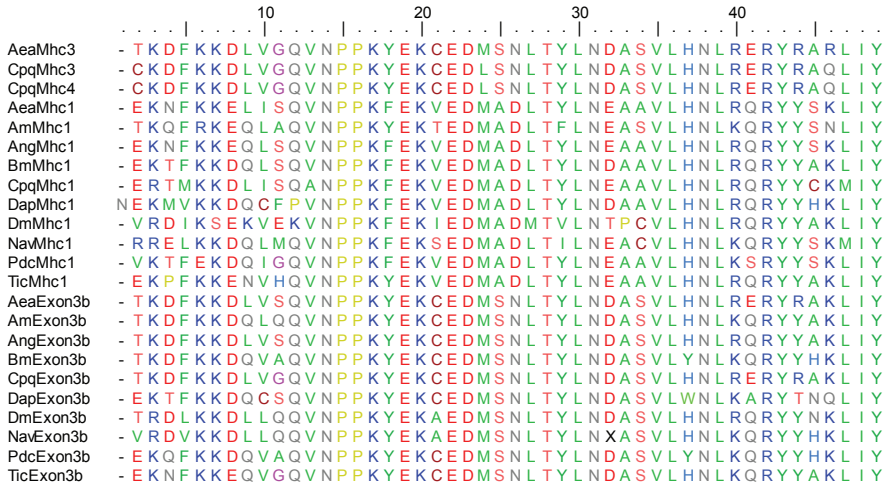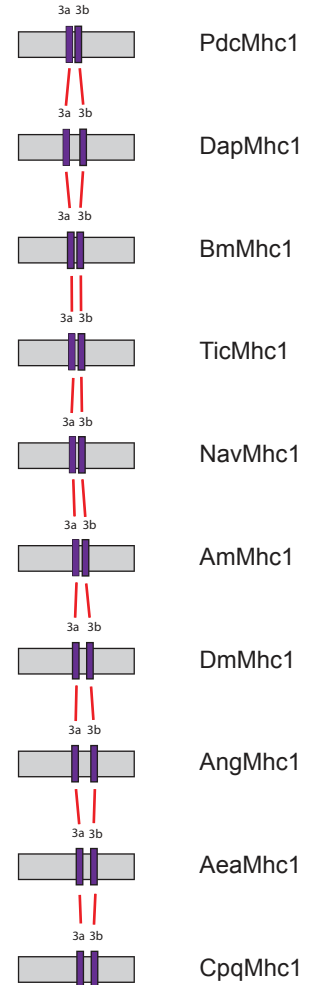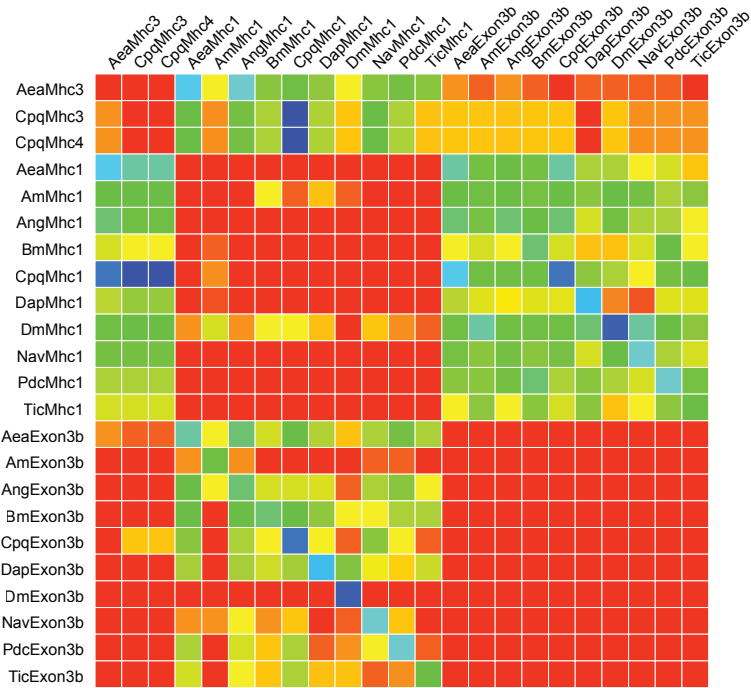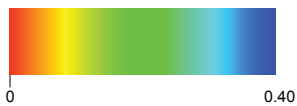

Figure 2

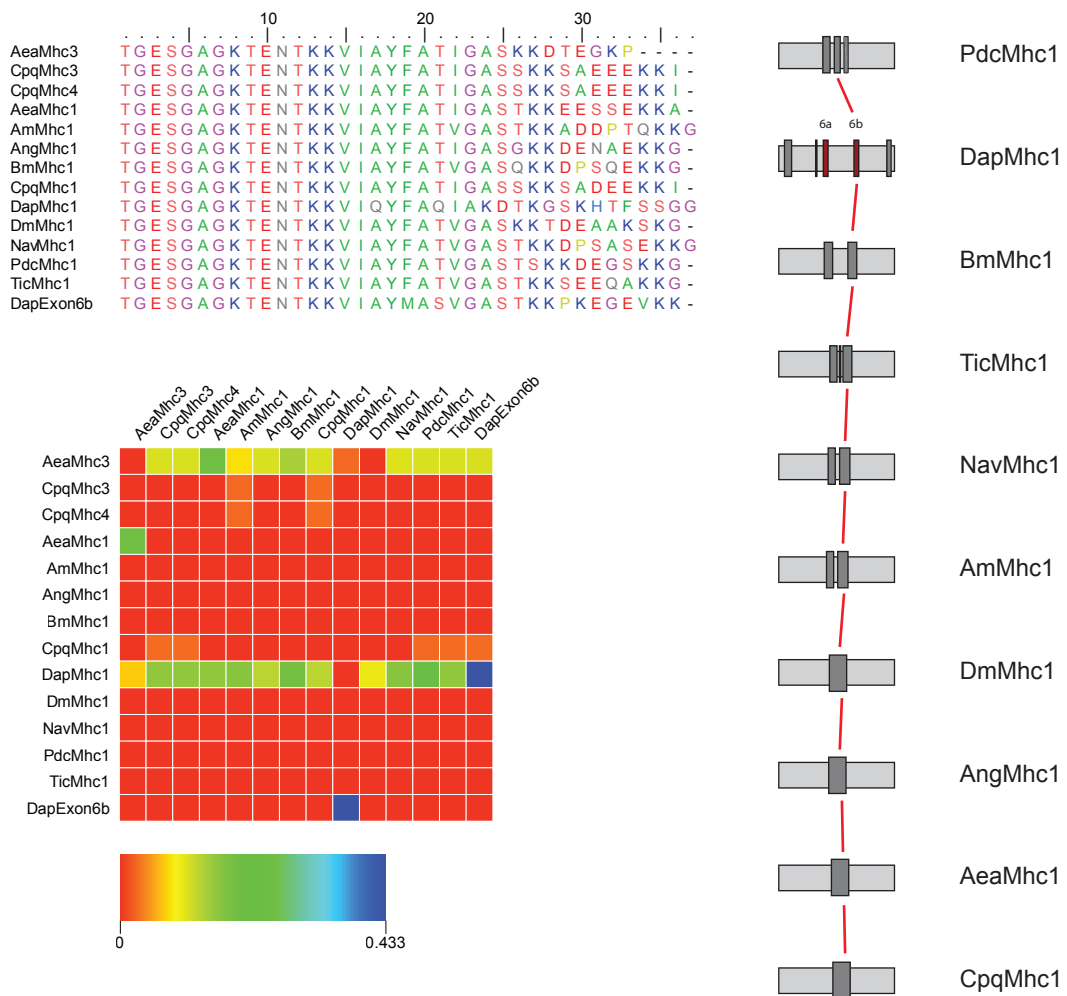

Figure 3

10 20 30

```

AeaMhc3  DMCLLSNDIYDYHNVAQGVKVTIPNVDDGEECRLLTD
CpqMhc3  EMCYLSNDIYDYNVVSQGVKVTIPNVDDGEECALTD
CpqMhc4  DMCYLSNDIYDYNVVSQGVKVTIPNVDDGEECLLTD
AeaMhc1  EKCLLSNNIYDYMVVAQGVKTTIPNVDDGEEEMSLTD
AmMhc1   EMCCLTNDIHDYVYFVSQGVKTTIPNVDDGEEECTLTD
AngMhc1  EKCFLSNDVYDYMIIAQGVKTTIPNVDDGEEEMGLTD
BmMhc1   EMCMLSNDIYDYYIVSQQGKITIPNVDDGEECVLTD
CpqMhc1  EKCFLSNNIYDYMVVAQGVKTTIPNVDDGEEEMSLTD
DapMhc1  ADCCLVDDIYQYNFVSQGVKITIPSMDDSEEMALTD
DmMhc1   DICLLTDNIYDYHIVSQQKVTIVASIDDAEEFSLTD
NavMhc1  EMCLLSNNVQDYFVAQGVKTTIPGVDDGEECELTD
PdcMhc1  AMCLLSDNIQDYFVVSQGVKTTIPNVDDGEEELRLTD
TicMhc1  EQCLLSNDVYDYHVAQGVKTTIPNVDDAEEMLLTD
AeaExon6b  EMCMLSNNIHDYHIVSQQGKITIPSVDDGEEEMLGT
AmExon8b  EMLLLSNNIHDYFVVSQGVKTTIPGLDDGEEELLITD
AngExon6b  EKCLLSNNIHDYHIVAQGVKTTIPSVDDGEEEMQITD
BmExon8b  AICLLSNDVMDYNIVSQQKTVIPGVDDGEEEMRLITD
CpqExon6b  EICFLSNNIHDYHIVSQQGTTIPSVDDGEEEMITD
DapExon10b ADCCLVDDIYTYNFVSQGVKITIPSMDDSEEMGLTN
DapExon10c ADCRLVDDIYTYNYVSQGVKITIPSMDDNEEMGLTD
DmExon7b  EYCLLSNNIYDYRIVSQQGTTIPSVNDSEEWVAVD
NavExon8b  EKCLLSKNINDYHFVVSQGVKTSIPGLDDGEEELITD
TicExon9b  EMCLLSNNVSDYFVAQGVKTTIPNVDDAEEELLITD
AeaExon6c  ELTLLSTRISDYPTITQGKTRIPGVNDAEELESLD
AmExon8c  ELTLLSNNIGDYWYISQGVKTRIPGVNDAADMEETD
AngExon6c  ELTLLSSRISDYPTITQGKTRIPGVNDAEEFEQLD
CpqExon6c  ELTLLSTRISDYPTITQGKTRIPGVNDAEELELTD
BmExon8c  EVTMLGNRISDYPIVSQGVKTRIPGVNDAAQFDVTV
DmExon7c  EMVFLGQHIGDYPGICQGVKTRIPGVNDGEEFELTD
NavExon8c  EMTFLSNRIGDYIYISQGVKTRIPGVNDGEMEDTD
AeaExon6d  DMCFLSNDIYDYNVAQGVKITIPNVDDGEECLLTD
AmExon8d  DMCLLSNNIYDYNVVSQGVKITIPNVDDGEECVLTD
AngExon6d  EMCFLSNDIYDYNVSQGVKITIPNVDDGEECLLTD
CpqExon6d  EMCFLSNDIYDYNVVSQGVKITIPNVDDGEECQLTD
BmExon8d  EKCLLSNDVHDYIYIVSQQGVKVTIPNVDDGEECILTD
DapExon10d AMCSLSDNIYDYPFVSQGVKVTVPISIDSEEMQMAD
DmExon7d  EMCFLSDNIYDYNVVSQGVKVTVPNMDGEEFQLAD
NavExon8d  EMCYLSNNIYDYNVVSQGVKITIPGIDDNNEEMGLTD
PdcExon9b  AMCLLSNNINDYHFVVSQGVKTAIPGVDDGEEEMLITD
TicExon9c  ENCLLSNDNVYDYNFVSQGVKVTIPGVDDAEEELLTD
  
```

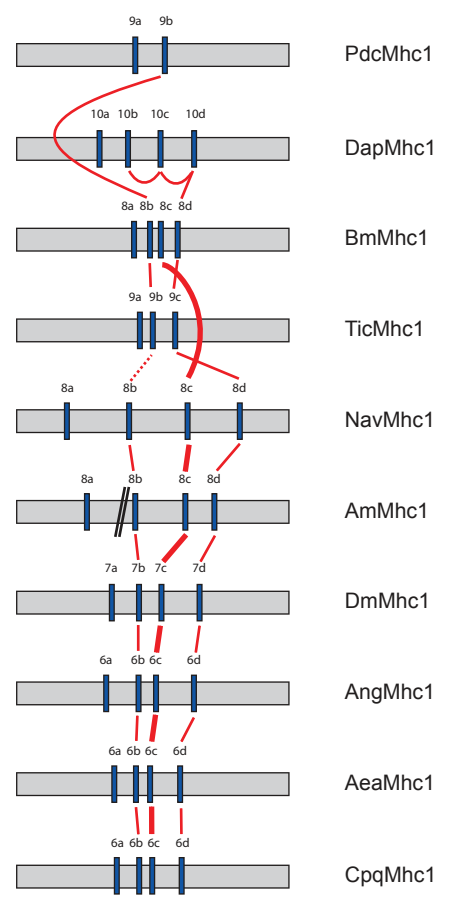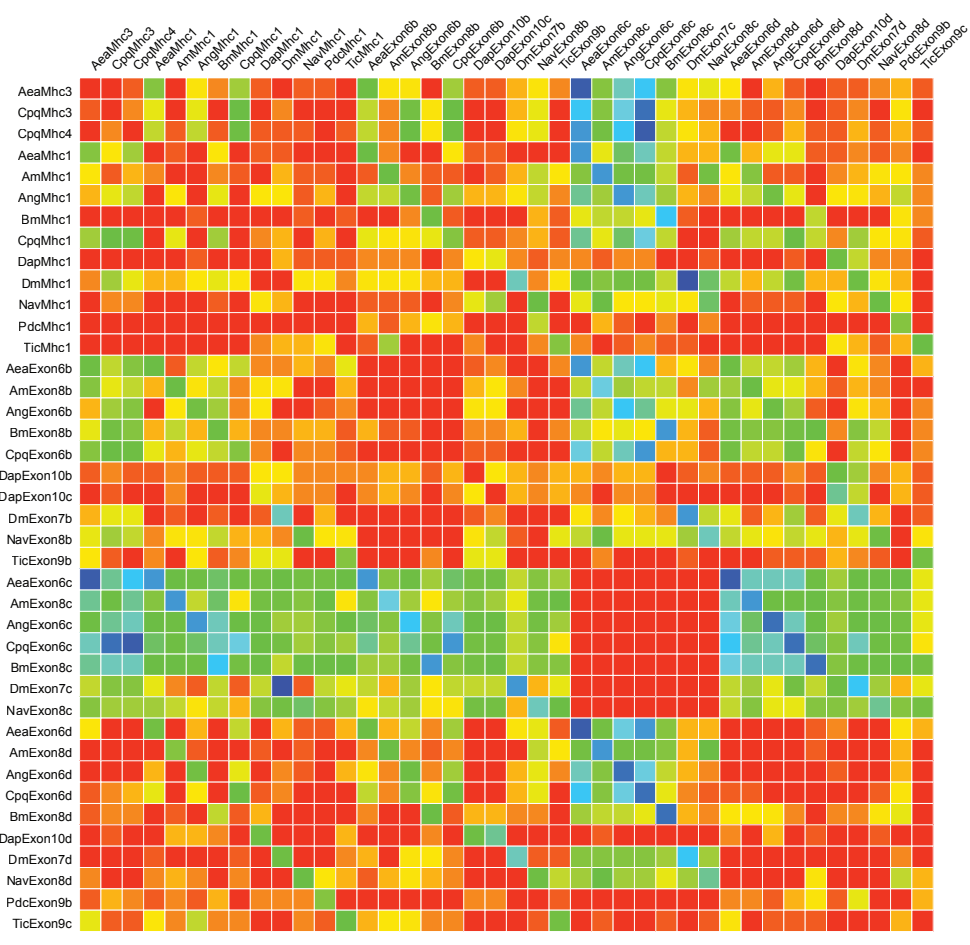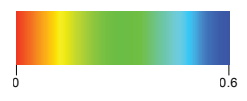



Figure 5

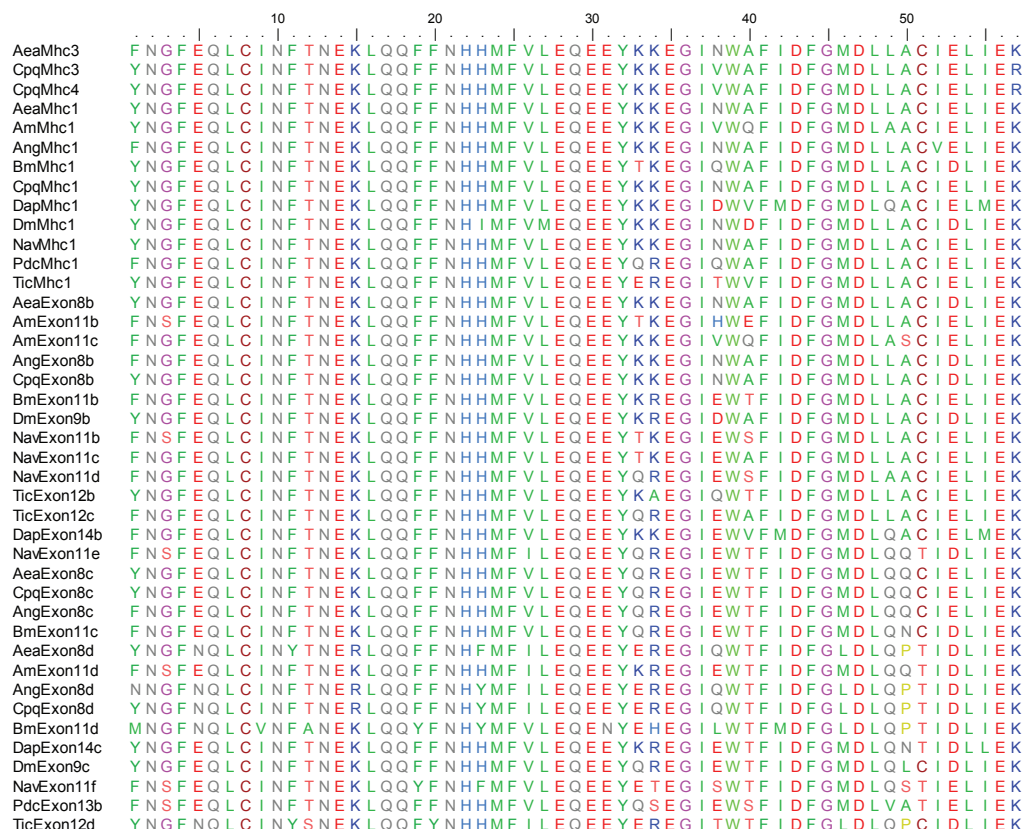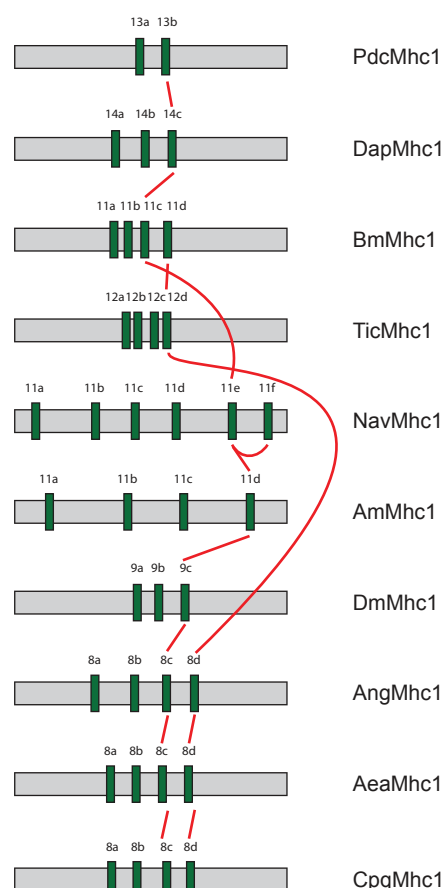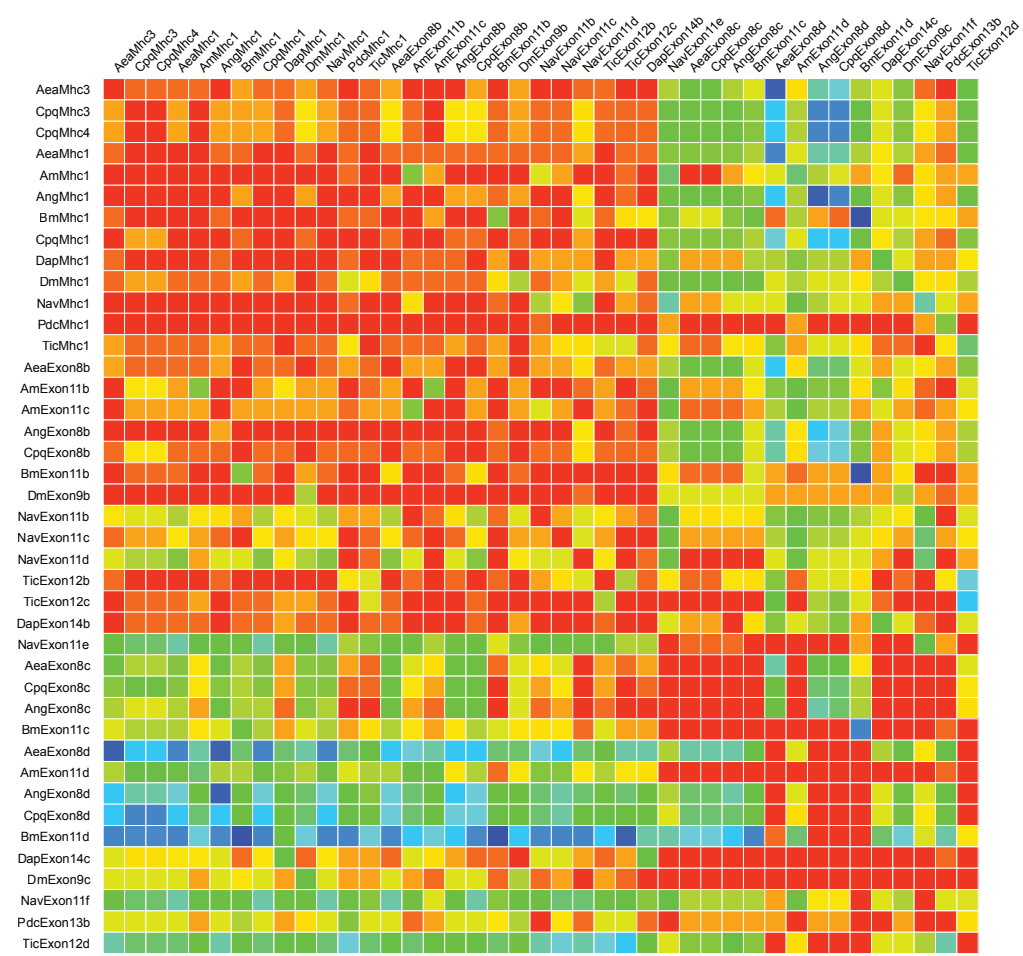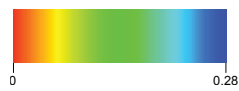

Figure 6

A

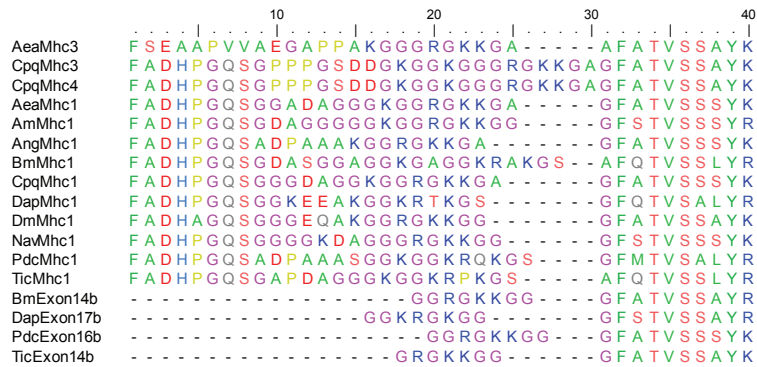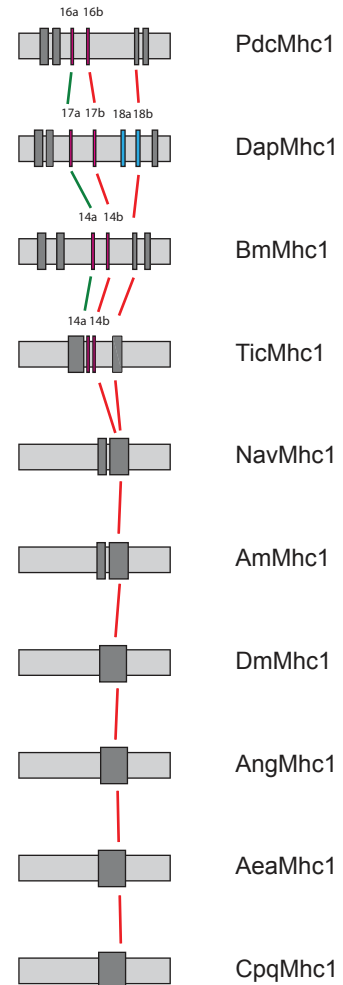

B

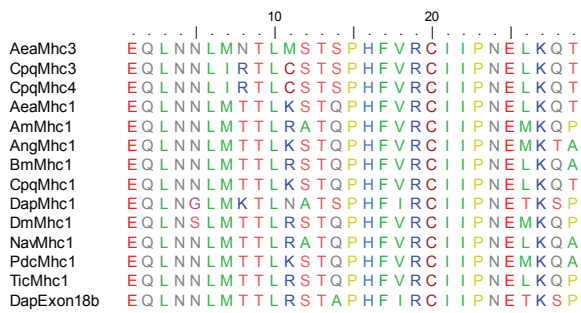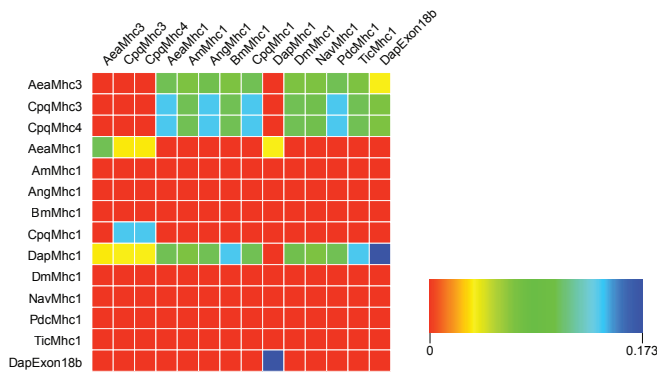



Figure 7

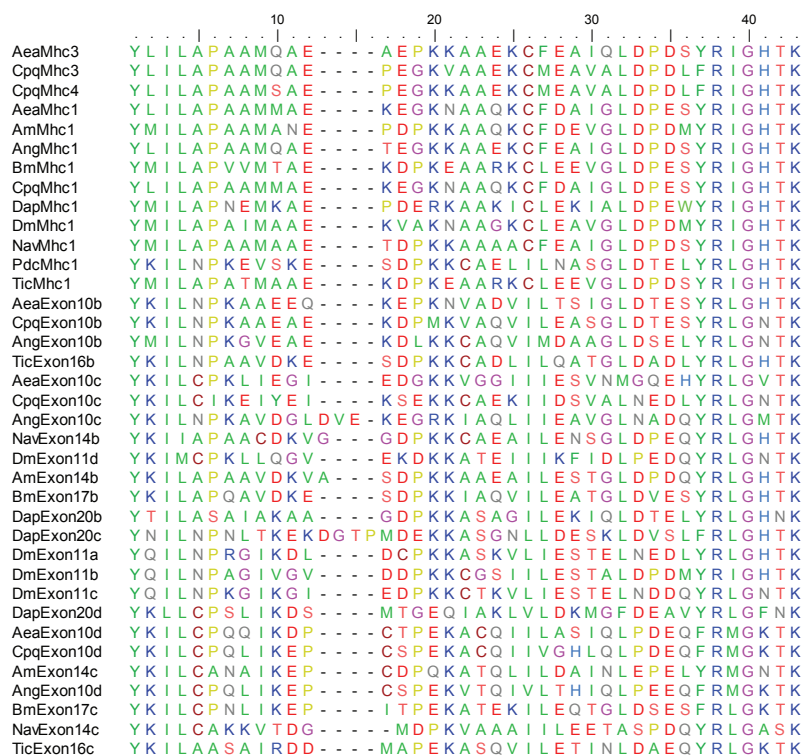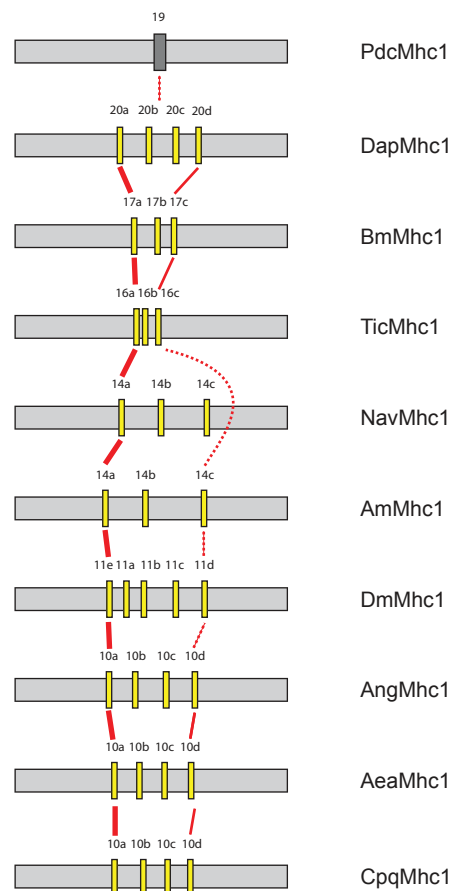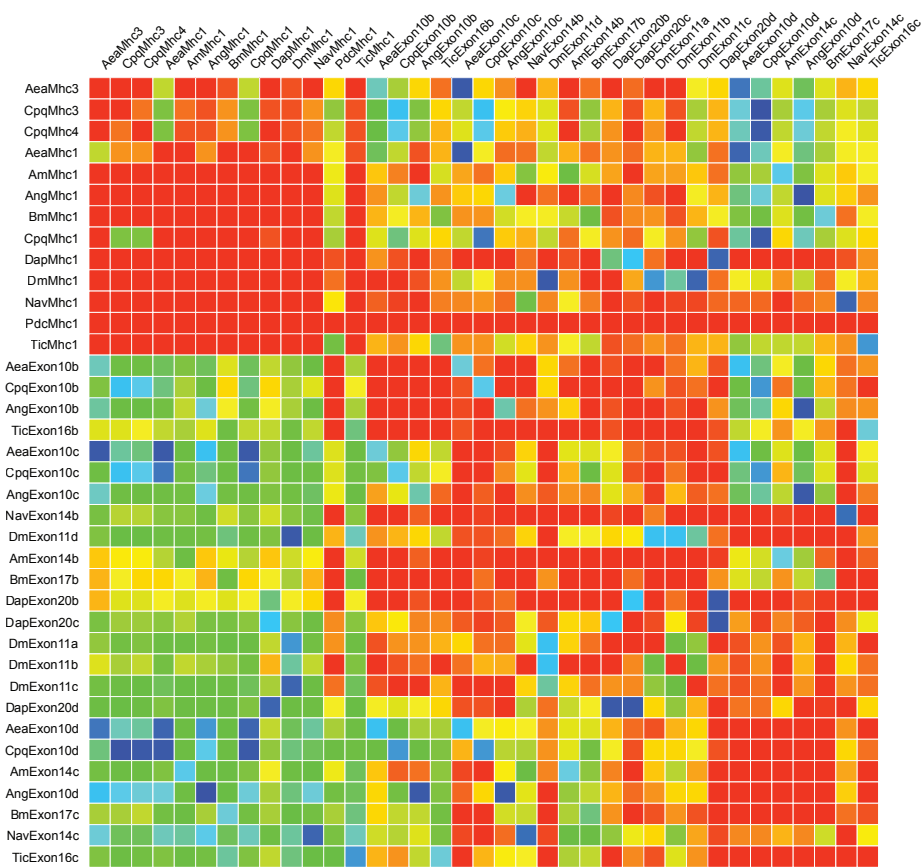

Figure 8

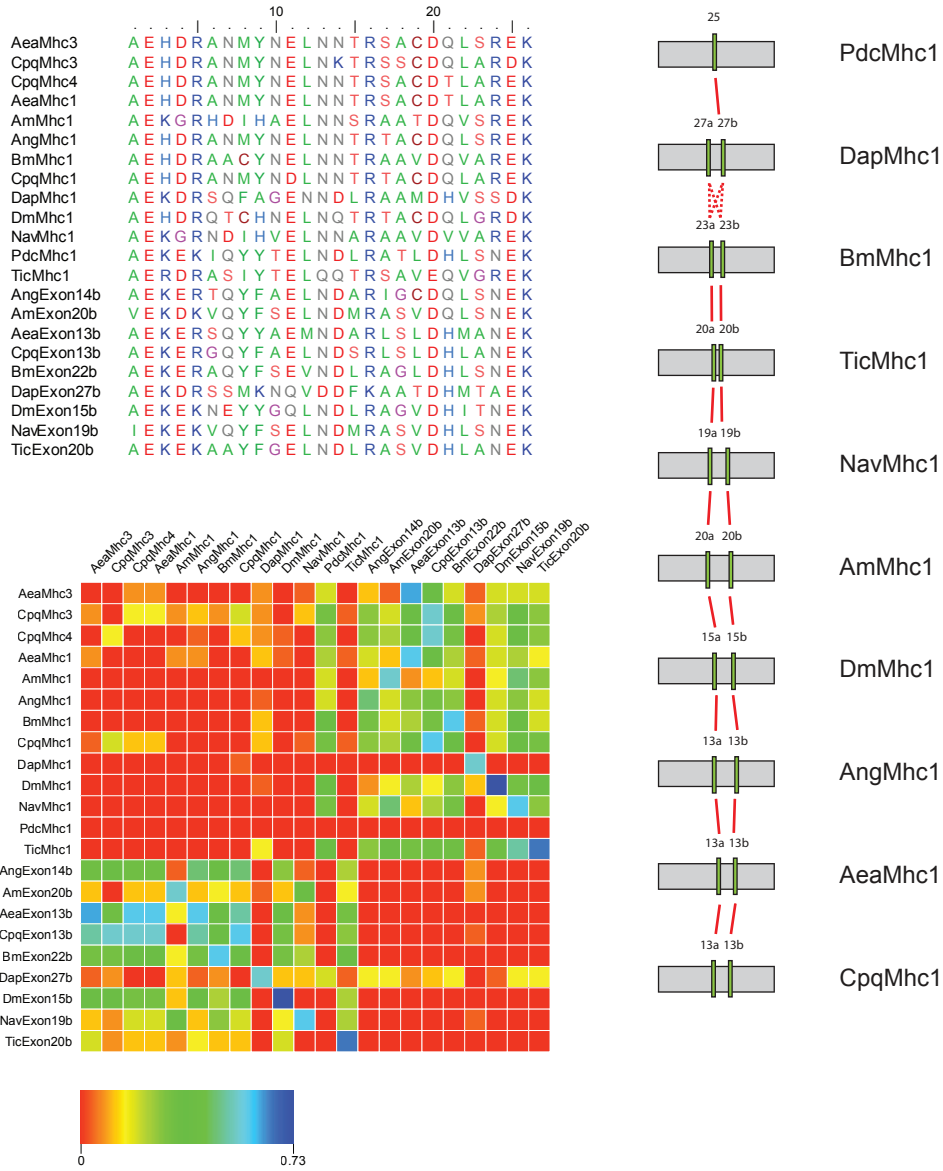

Figure 9

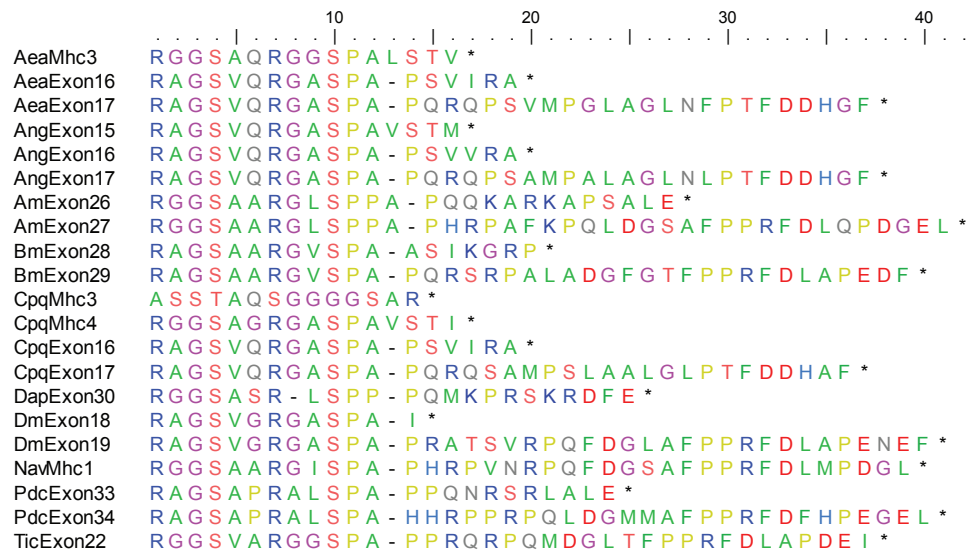

Supplement: 1471-2199-9-21-S2.pdf [file 1471-2199-9-21-S2.pdf]
